# Supplementary material
Source: PubMed Central journal article supplement (PMC2727437)
Supplement: embor200991-s1.pdf [file embor200991-s1.pdf]

## ***Supplementary Materials***

### **Supplementary Figure Legends:**

**Supplementary Figure S1.** Gel-filtration analysis of EphA2, ephrin-A1 and the EphA2/ephrin-A1 complex reveals that the unbound molecules are monomeric and, upon binding, form a 1:1 heterodimeric complex. The elution volumes for the peaks on a SD200 column (Pharmacia) are given in milliliters, and correspond to ~18-20 KDa for the individual molecules and ~35-40 KDa for their complex.

**Supplementary Figure S2.** A close-up view of the equivalent ligand/receptor interface region in the EphA2/ephrin-A1 (left) and EphB2/ephrin-B2 (right) complexes, highlighting class-specific residues and interactions. The Eph receptors are in blue and the ephrins in red.

**Supplementary Table 1:** Summary of crystallographic analysis

---

|                        | <u>EphA2:</u>                                                   | <u>EphA2/ephrin-A1:</u>                                      |
|------------------------|-----------------------------------------------------------------|--------------------------------------------------------------|
| Resolution, Å          | 30.0-2.5 (2.6-2.5)                                              | 30.0-2.0 (2.05-2.0)                                          |
| Wavelength, Å          | 0.9795                                                          | 1.033                                                        |
| Completeness, %        | 96.77 (80.15)                                                   | 96.1 (91.2)                                                  |
| Redundancy, fold       | 5.6 (4.6)                                                       | 2.3 (2.2)                                                    |
| I/σI                   | 9.2 (3.2)                                                       | 18.2 (3.7)                                                   |
| R <sub>merge</sub> , % | 9.4 (26.9)                                                      | 6.9 (27.3)                                                   |
| Space Group            | P1                                                              | P1                                                           |
| Cell Dimensions, Å     | a= 41.27, b= 91.19, c= 91.13,<br>α= 117.14, β= 97.27, γ= 100.79 | a=58.48, b=102.11, c=135.26,<br>α= 84.25, β= 79.77, γ= 73.94 |

### Refinement

|                                      |                       |                       |
|--------------------------------------|-----------------------|-----------------------|
| Reflections working / test           | 33190 / 1856          | 192014 / 9696         |
| Residues                             | 1044                  | 2448                  |
| Solvent                              | 178                   | 3333                  |
| R <sub>crys</sub> /R <sub>free</sub> | 23.2/30.9 (25.6/39.2) | 18.5/24.8 (19.1/26.5) |
| R.m.s. deviations                    |                       |                       |
| Bonds, Å                             | 0.017                 | 0.013                 |
| Angles, °                            | 1.71                  | 1.50                  |
| Average B-factor, Å <sup>2</sup>     | 3.1                   | 14.3                  |
| Ramachandran Analysis                |                       |                       |
| Most favored regions                 | 93.2 %                | 94.1 %                |

---

$R_{\text{merge}} = \sum |I - \langle I \rangle| / \sum I$ , where  $I$  = observed intensity and  $\langle I \rangle$  = average intensity obtained from multiple observations of symmetry-related reflections. The r.m.s. deviation in bond lengths and angles are the respective root-mean-square deviations from ideal values. Values in the parentheses are for the highest resolution shell.

## **Supplementary Materials – Methods**

### *Site-Directed Mutagenesis and Cell Stimulation*

EphA2 cDNA was subcloned into pBabe retroviral expression plasmid. Site-directed mutagenesis was carried out using QuickChange kit from QiaGen according to manufacture's instructions. Phoenix cells were transfected with the plasmids using Lipofectamine Plus reagent (Invitrogen) and selected in 2  $\mu$ g/ml puromycin (Sigma). Retrovirus particles were harvested and used to infected HEK 293 cells. HEK 293 cell stimulation and analysis with ephrin-A1-Fc was carried out as previously described (Miao et al, 2000). For PC-3 cell stimulation, ephrin-A1-Fc or ephrin-B1-Fc was either unclustered or clustered with five molar excess of anti-human Fc antibody, and added to cells cultured to near confluency on six-well plates. Cells were lysed 10 min later with RIPA buffer. Total cell lysates or EphA2 and EphB2 immunoprecipitates were subject to immunoblot with the indicated antibodies.

### *Reference for Supplementary Materials:*

Miao H, Burnett E, Kinch M, Simon E, Wang B (2000) Activation of EphA2 kinase suppresses integrin function and causes focal-adhesion-kinase dephosphorylation. *Nat Cell Biol* 2(2): 62-69
